# Supplementary material for: High frequency of SPG4 in Taiwanese families with autosomal dominant hereditary spastic paraplegia
Source: Springer Nature journal article supplement (doi:10.1186/s12883-014-0216-x), 2014-11-24
Supplement: MOESM1 [file 9742122]

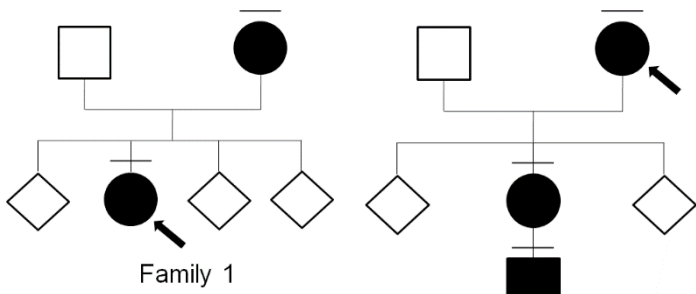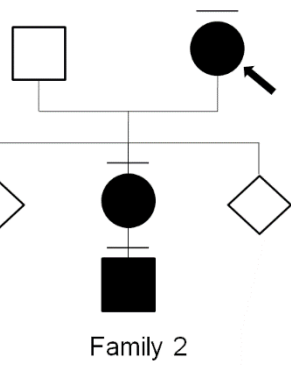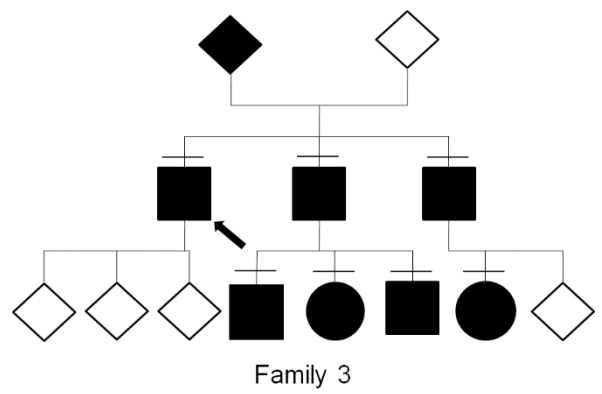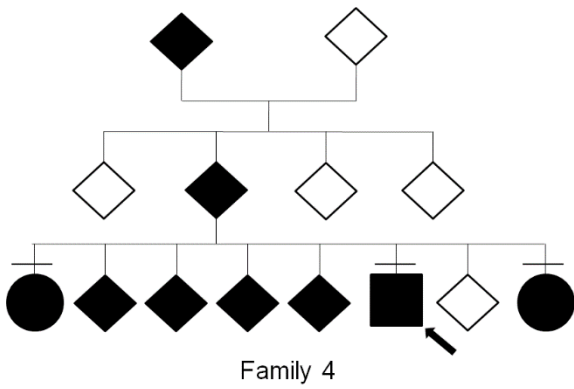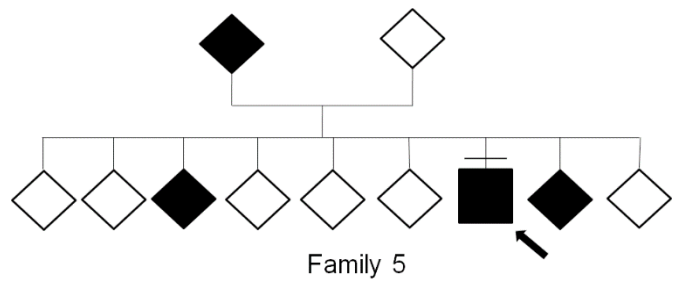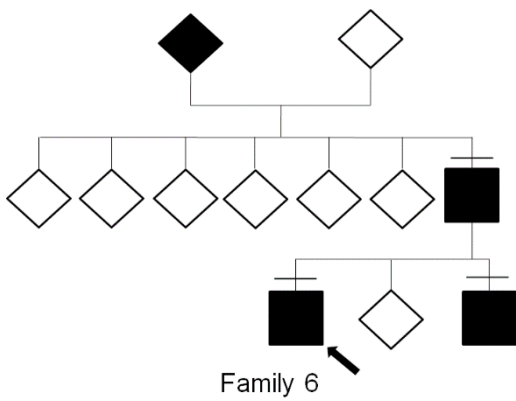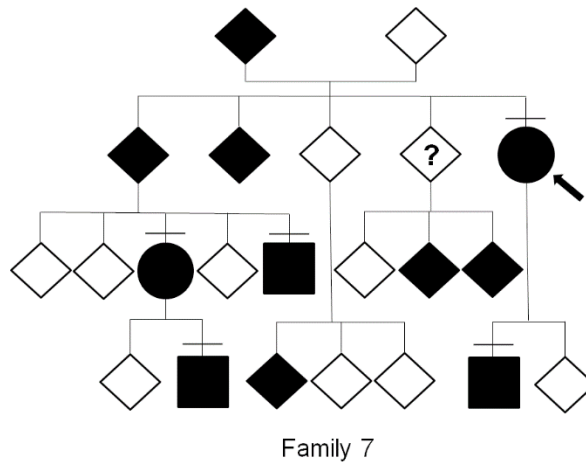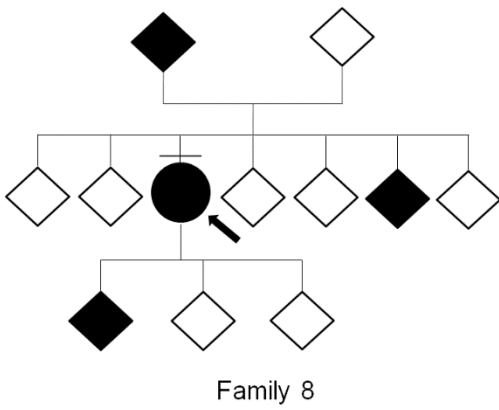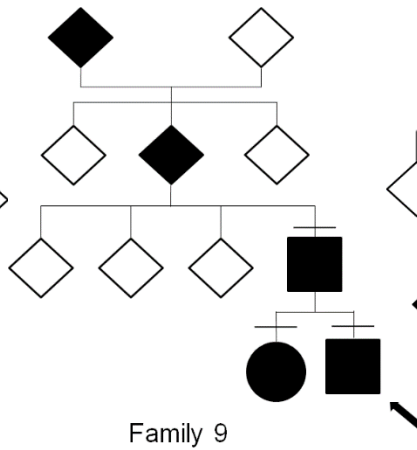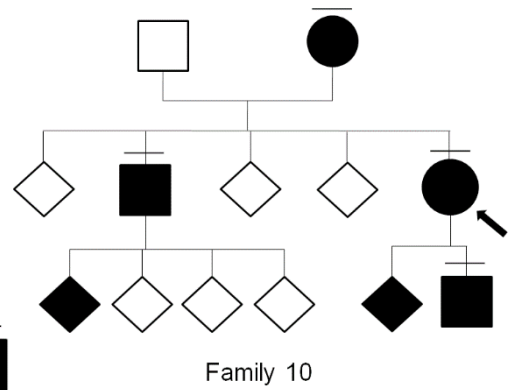

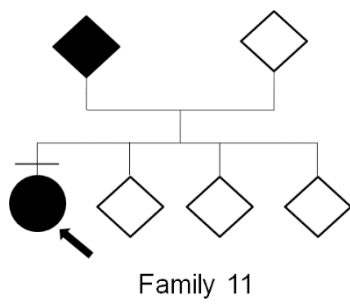

Family 11

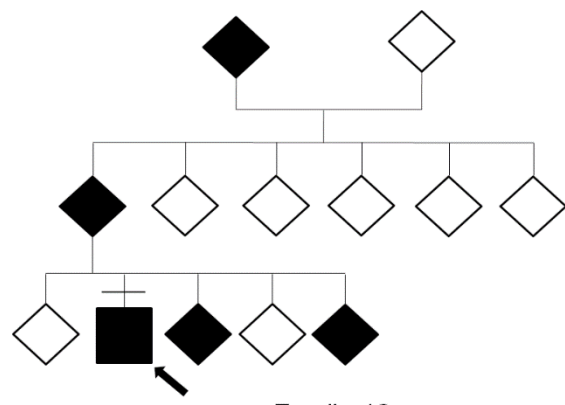

Family 12

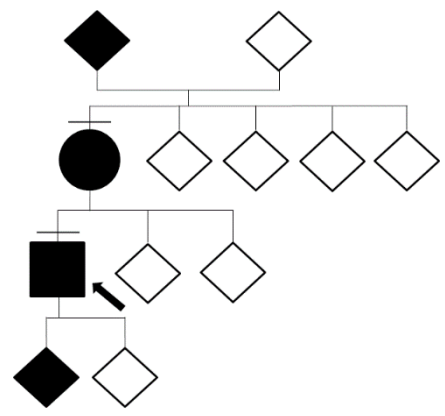

Family 13

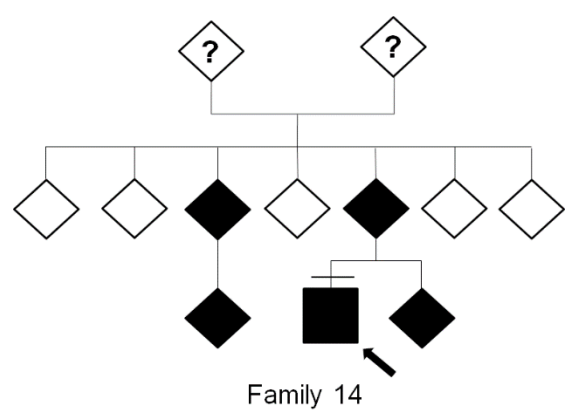

Family 14

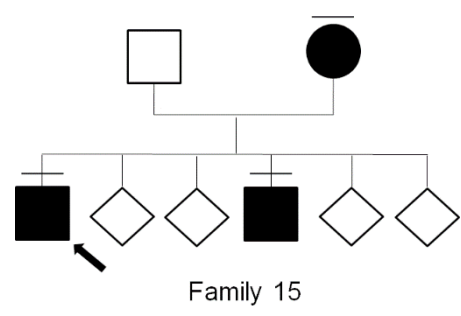

Family 15

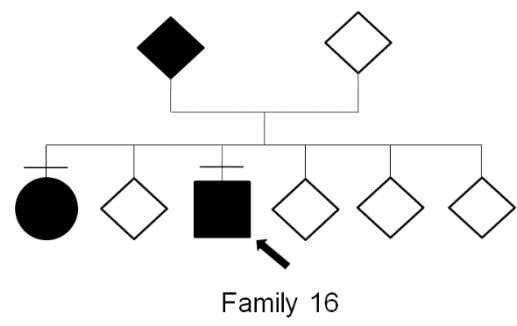

Family 16

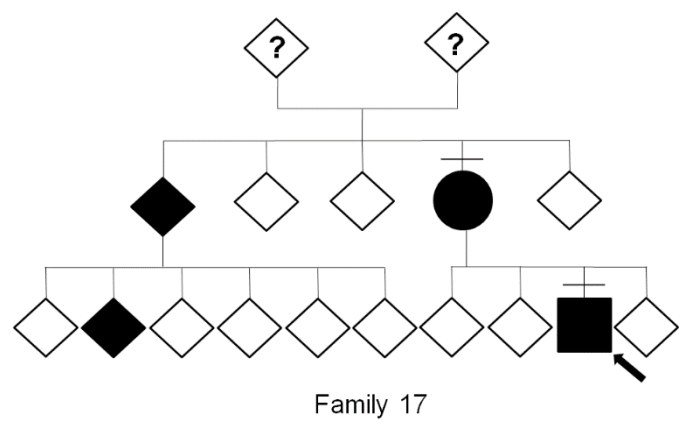

Family 17

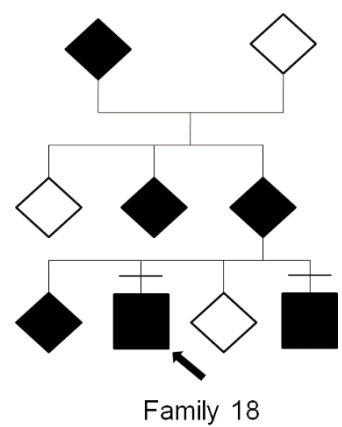

Family 18

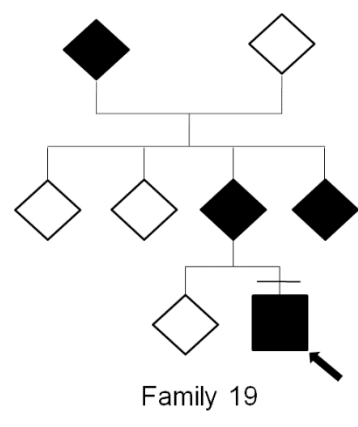

Family 19

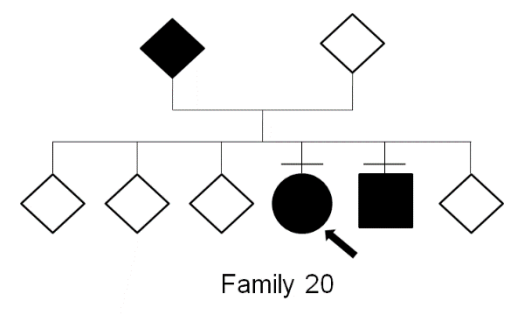

Family 20
