# Supplementary material for: High frequency of SPG4 in Taiwanese families with autosomal dominant hereditary spastic paraplegia
Source: Springer Nature journal article supplement (doi:10.1186/s12883-014-0216-x), 2014-11-24
Supplement: MOESM2 [file 9742122]

---

| Species           | p.L461P                      | p.D555G                      |
|-------------------|------------------------------|------------------------------|
| Homo sapiens      | EGEHDASRR <b>L</b> KTEFLIEFD | GSDLTALAK <b>D</b> AALGPiREL |
| Pan troglodytes   | EGEHDASRR <b>L</b> KTEFLIEFD | GSDLTALAK <b>D</b> AALGPiREL |
| Bos Taurus        | EGEHDASRR <b>L</b> KTEFLIEFD | GSDLTALAK <b>D</b> AALGPiREL |
| Canis lupus       | EGEHDASRR <b>L</b> KTEFLIEFD | GSDLTALAK <b>D</b> AALGPiREL |
| Rattus norvegicus | EGEHDASRR <b>L</b> KTEFLIEFD | GSDLTALAK <b>D</b> AALGPiREL |
| Mus musculus      | EGEHDASRR <b>L</b> KTEFLIEFD | GSDLTALAK <b>D</b> AALGPiREL |
| Gallus gallus     | EGEHDASRR <b>L</b> KTEFLIEFD | GSDLTALVK <b>D</b> AALGPiREL |
| Danio rerio       | EGEHDASRR <b>L</b> KTEFLIEFD | GDLTSLAK <b>D</b> AALGPiREL  |

---
