# Supplementary material for: High frequency of SPG4 in Taiwanese families with autosomal dominant hereditary spastic paraplegia
Source: Springer Nature journal article supplement (doi:10.1186/s12883-014-0216-x), 2014-11-24

## Family 2

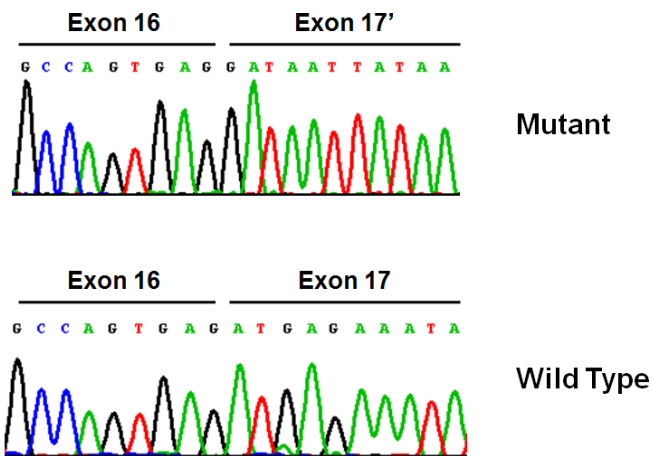

## Family 9

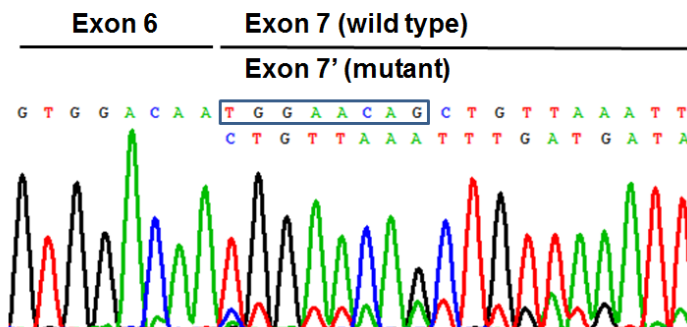

## Family 10

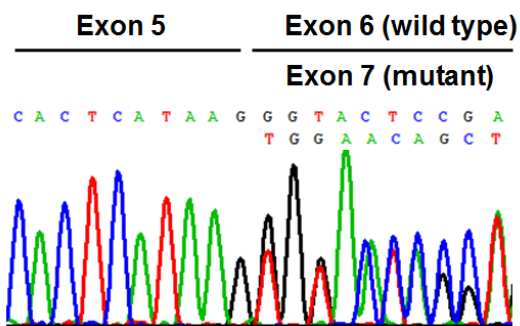

Supplement: MOESM3 [file 9742122]
